# Supplementary material for: Rebound growth of BRAF mutant pediatric glioma cells after MAPKi withdrawal is associated with MAPK reactivation and secretion of microglia-recruiting cytokines
Source: PubMed Central journal article supplement (PMC11147834; doi:10.1007/s11060-024-04672-9), 2024-04-17
Supplement: 11060_2024_4672_MOESM3_ESM.pdf [file 11060_2024_4672_MOESM3_ESM.pdf]

## **Rebound growth of BRAF mutant pediatric glioma cells after MAPKi withdrawal is associated with MAPK reactivation and secretion of microglia-recruiting cytokines**

Daniela Kocher<sup>1,2,3,4</sup>, Lei Cao<sup>5,6</sup>, Romain Guicho<sup>5,7</sup>, Melanie Langhammer<sup>8,9</sup>, Yun-Lu Lai<sup>1,2,3</sup>, Pauline Becker<sup>1,2,3,10</sup>, Hiba Hamdi<sup>5</sup>, Dennis Friedel<sup>4,11,12</sup>, Florian Selt<sup>1,2,3,13</sup>, David Vonhören<sup>4,11,12</sup>, Julia Zaman<sup>4,11,12</sup>, Gintvile Valinciute<sup>1,2,3</sup>, Sonja Herter<sup>1,2,3,4</sup>, Daniel Picard<sup>14,15,16</sup>, Johanna Rettenmeier<sup>1,2,10,17,18</sup>, Kendra K. Maass<sup>1,2,17,18</sup>, Kristian W. Pajtler<sup>1,2,13,17,18</sup>, Marc Remke<sup>19</sup>, Andreas von Deimling<sup>11,12</sup>, Stefan Pusch<sup>11,12</sup>, Stefan M. Pfister<sup>1,2,13,17</sup>, Ina Oehme<sup>1,2,3</sup>, David T.W. Jones<sup>1,2,20</sup>, Sebastian Halbach<sup>8,21</sup>, Tilman Brummer<sup>8,21,22</sup>, Juan Pedro Martinez-Barbera<sup>5</sup>, Olaf Witt<sup>1,2,3,13</sup>, Till Milde<sup>1,2,3,13,\*\*</sup>, Romain Sigaud<sup>1,2,3,\*</sup>

<sup>1</sup>Hopp Children's Cancer Center Heidelberg (KiTZ), Heidelberg, Germany

<sup>2</sup>National Center for Tumor Diseases (NCT), NCT Heidelberg, a partnership between DKFZ and Heidelberg University Hospital, Germany.

<sup>3</sup>German Cancer Research Center (DKFZ) Heidelberg, Clinical Cooperation Unit Pediatric Oncology, Germany

<sup>4</sup>Faculty of Biosciences, Heidelberg University, Heidelberg, Germany

<sup>5</sup>Developmental Biology and Cancer Programme, Birth Defects Research Centre, Great Ormond Street Institute of Child Health, University College London, 30 Guilford Street, London, WC1N 1EH, UK

<sup>6</sup>Department of Neurosurgery, Beijing Tiantan Hospital, Capital Medical University, Beijing, China

<sup>7</sup>Nantes Université, Oniris, INSERM, Regenerative Medicine and Skeleton, RMeS, UMR 1229, F-44000 Nantes, France

<sup>8</sup>Institute of Molecular Medicine and Cell Research (IMMZ), Faculty of Medicine, University of Freiburg

<sup>9</sup>Faculty of Biology, University of Freiburg, Freiburg, Germany

<sup>10</sup>Faculty of Medicine, Heidelberg University, Heidelberg, Germany.

<sup>11</sup>Department of Neuropathology, Heidelberg University Hospital, Heidelberg, Germany

<sup>12</sup>German Cancer Research Center (DKFZ), Clinical Cooperation Unit Neuropathology, Heidelberg, Germany

<sup>13</sup>KiTZ Clinical Trial Unit (ZIPO), Department of Pediatric Hematology and Oncology, Heidelberg University Hospital, Heidelberg, Germany

<sup>14</sup>Department of Pediatric Oncology, Hematology, and Clinical Immunology, Medical Faculty, and University Hospital Düsseldorf, Heinrich Heine University, Düsseldorf, Germany

<sup>15</sup>German Cancer Consortium (DKTK), Partner site Essen/Düsseldorf, Düsseldorf, Germany

<sup>16</sup>Institute of Neuropathology, Medical Faculty, and University Hospital Düsseldorf, Heinrich Heine University, Düsseldorf, Germany

<sup>17</sup>German Cancer Research Center (DKFZ), Division of Pediatric Neurooncology, Heidelberg, Germany

<sup>18</sup>Department of Pediatric Oncology, Hematology, Immunology and Pulmonology, Heidelberg University Hospital, Heidelberg, Germany

<sup>19</sup>Pediatric Hematology and Oncology, University Children's Hospital, Saarland University, Homburg, Germany

<sup>20</sup>German Cancer Research Center (DKFZ) Heidelberg, Division of Pediatric Glioma Research, Germany

<sup>21</sup>German Consortium for Translational Cancer Research (DKTK), Freiburg, Germany, German Cancer Research Center (DKFZ), Heidelberg, Germany

<sup>22</sup>Centre for Biological Signaling Studies BIOS, University of Freiburg

\*Corresponding author: Dr. Romain Sigaud, Hopp Children's Cancer Center Heidelberg (KiTZ), Im Neuenheimer Feld 280, 69120, Heidelberg, Germany ([r.sigaud@kitz-heidelberg.de](mailto:r.sigaud@kitz-heidelberg.de))

\*\*Corresponding author: Prof. Dr. med. Till Milde, Hopp Children's Cancer Center Heidelberg (KiTZ), Im Neuenheimer Feld 280, 69120, Heidelberg, Germany ([t.milde@kitz-heidelberg.de](mailto:t.milde@kitz-heidelberg.de))

## SUPPLEMENTARY TABLES

**Table S1 Vi-CELL XR counting settings**

|                             |            |
|-----------------------------|------------|
| Cell brightness             | 85%        |
| Cell sharpness              | 100        |
| Viable cell spot brightness | 65%        |
| Viable cell spot area       | 5%         |
| Minimum circularity         | 0          |
| Decluster degree            | Medium     |
| Minimum diameter            | 5 microns  |
| Maximum diameter            | 50 microns |
| Images                      | 50         |
| Aspirate cycles             | 1          |
| Trypan blue mixing cycles   | 3          |

**Table S2 Seeding densities**

wd = withdrawal

| <b>Experiment</b>                                               | <b>Format</b>             | <b>Cell line</b>                                      | <b>Condition</b>       | <b>Seeding density<br/>(number of cells)</b> |
|-----------------------------------------------------------------|---------------------------|-------------------------------------------------------|------------------------|----------------------------------------------|
| Metabolic activity assay                                        | 96-well-plate             | BT-40                                                 |                        | 0.03x10 <sup>6</sup>                         |
| Cell counting for growth curve analysis                         | 6-well-plate              | BT-40                                                 |                        | 0.2x10 <sup>6</sup>                          |
|                                                                 |                           | DKFZ-BT66 proliferating                               |                        | 0.1x10 <sup>6</sup>                          |
|                                                                 |                           | DKFZ-BT66 senescent                                   |                        | 0.2x10 <sup>6</sup>                          |
|                                                                 |                           | DKFZ-BT308 and DKFZ-BT314 senescent and proliferating |                        | 0.1x10 <sup>6</sup>                          |
| Sample generation for qPCR and WB analysis                      | 6-well-plate              | BT-40                                                 | 5 days DMSO + wd       | 0.2x10 <sup>6</sup>                          |
|                                                                 |                           |                                                       | 5 days treatment + wd  | 1x10 <sup>6</sup>                            |
| RNAseq sample generation                                        | 6 cm dish                 | BT-40                                                 | 5 days DMSO + wd       | 0.6x10 <sup>6</sup>                          |
|                                                                 |                           |                                                       | 5 days dabrafenib + wd | 1.5x10 <sup>6</sup>                          |
| Sample generation for LC-MS/MS proteomics and phosphoproteomics | 10 cm dish (3 per sample) | BT40                                                  | 5 days DMSO + wd       | 2x10 <sup>6</sup>                            |
|                                                                 |                           |                                                       | 5 days dabrafenib + wd | 5x10 <sup>6</sup>                            |
| Multiplexed ELISA assay                                         | 6 cm dish                 | BT-40                                                 | 5 days DMSO + wd       | 0.4x10 <sup>6</sup>                          |
|                                                                 |                           |                                                       | 5 days dabrafenib + wd | 1.5x10 <sup>6</sup>                          |
|                                                                 | 6 cm dish                 | BT-40                                                 | 5 days DMSO + wd       | 0.4x10 <sup>6</sup>                          |

|                              |                    |       |                        |                      |
|------------------------------|--------------------|-------|------------------------|----------------------|
| Kinase phosphorylation array |                    |       | 5 days dabrafenib + wd | 1.5x10 <sup>6</sup>  |
| Conditioned media collection | 6 cm dish          | BT-40 | 5 days DMSO + wd       | 0.4x10 <sup>6</sup>  |
|                              |                    |       | 5 days dabrafenib + wd | 1.5x10 <sup>6</sup>  |
| Transwell migration assay    | 24-well transwells | HMC3  |                        | 0.1x10 <sup>6</sup>  |
| Transwell co-culture         | 6-well-plate       | BT-40 |                        | 0.2x10 <sup>6</sup>  |
|                              | 6-well transwells  | HMC3  |                        | 0.08x10 <sup>6</sup> |

**Table S3 Inhibitors used in *in vitro* experiments**

| <b>Inhibitor</b> | <b>Stock concentration<br/>[mM]</b> | <b>Solvent</b>  | <b>Supplier</b>                                      |
|------------------|-------------------------------------|-----------------|------------------------------------------------------|
| Dabrafenib       | 10                                  | DMSO            | Selleckchem                                          |
| Trametinib       | 10                                  | DMSO            | Selleckchem                                          |
| Vincristine      | 10                                  | DMSO            | Selleckchem                                          |
| Carboplatin      | 27                                  | Saline solution | Pharmacy of the university<br>hospital of Heidelberg |
| Alpelisip        | 10                                  | DMSO            | MedChemExpress                                       |
| Ipatasertib      | 10                                  | DMSO            | MedChemExpress                                       |

**Table S4 Pharmacokinetic data for inhibitors used**

Plasma-protein-binding was taken from DrugBank (PMID: 29126136).

| <b>Inhibitor</b> | <b>C<sub>max</sub> [nM]</b> | <b>Plasma-protein-binding (%)</b> | <b>Unbound C<sub>max</sub> [nM]</b> | <b>Reference for C<sub>max</sub></b> |
|------------------|-----------------------------|-----------------------------------|-------------------------------------|--------------------------------------|
| Dabrafenib       | 2856.2                      | 99.7                              | 8.57                                | PMID:<br>37441736                    |
| Trametinib       | 36.07                       | 97.4                              | 0.94                                | PMID:<br>37441736                    |
| Vincristine      | 69.43                       | 75                                | 17.36                               | PMID:<br>32635465                    |
| Carboplatin      | 59000                       | 25-50                             | 29500-44250                         | PMID:<br>8137457                     |
| Alpelisip        | 7243.87                     | 89                                | 796.83                              | PMID:<br>37441736                    |
| Ipatasertib      | 1065.5                      | No information found              | N/A                                 | PMID:<br>32205017                    |

**Table S5 Primers**

| <b>Gene</b>                       | <b>Forward primer 5'-3'</b> | <b>Reverse primer 5'-3'</b>  | <b>Supplier</b>                          |
|-----------------------------------|-----------------------------|------------------------------|------------------------------------------|
| <i>ACTB</i>                       | CTGGAACGGTGAA<br>GGTGACA    | AAGGGACTTCCTGT<br>AACAATGCA  | Invitrogen                               |
| <i>TBP</i>                        | AGAACAACAGCCTG<br>CCAC      | GTTGCTCTTCCAAA<br>ATAGACAGAC | Invitrogen                               |
| <i>FOS</i>                        | /                           | /                            | Qiagen (Hs_FOS_1_SG,<br>cat. no. 249900) |
| <i>CCL2</i><br>(PMID: 30504064)   | GCTCAGCCAGATGC<br>AATCAAT   | ACTTGCTGCTGGTG<br>ATTCTTCTA  | Invitrogen                               |
| <i>CXCL10</i><br>(PMID: 18495678) | GAACTGTACGCTGT<br>ACCTGCA   | TTGATGGCCTTCGA<br>TTCTGGA    | Invitrogen                               |
| <i>CX3CL1</i><br>(PMID: 26015616) | GGATGCAGCCTCAC<br>AGTCCTTAC | GGCCTCAGGGTCC<br>AAAGACA     | Invitrogen                               |
| <i>CCL7</i><br>(PMID: 33257678)   | GTCCCCGGGAAGC<br>TGTAATC    | GCTTTGGAGTTTGG<br>GTTTTCTT   | Invitrogen                               |

**Table S6 Antibodies and pos. control used for WB analysis**

| <b>Antibody</b>                         | <b>Dilution</b> | <b>Source/clonality</b> | <b>Supplier</b> | <b>Catalog number</b> |
|-----------------------------------------|-----------------|-------------------------|-----------------|-----------------------|
| pMEK1/2 (S217/S221)                     | 1:1000          | Rabbit monoclonal       | Cell Signaling  | 9154T                 |
| MEK1/2                                  | 1:1000          | Rabbit polyclonal       | Cell Signaling  | 9122S                 |
| pERK1/2 (T202/T204)                     | 1:1000          | Rabbit monoclonal       | Cell Signaling  | 4377S                 |
| ERK1/2                                  | 1:1000          | Rabbit monoclonal       | Cell Signaling  | 4695P                 |
| pFRA1 (S265)                            | 1:1000          | Rabbit monoclonal       | Cell Signaling  | 5841S                 |
| FRA1                                    | 1:1000          | Rabbit monoclonal       | Cell Signaling  | 5281S                 |
| DUSP6                                   | 1:1000          | Rabbit polyclonal       | Cell Signaling  | 39441                 |
| pAKT1/2 (S473)                          | 1:1000          | Rabbit polyclonal       | Cell Signaling  | 9271                  |
| AKT1/2                                  | 1:1000          | Rabbit polyclonal       | Cell Signaling  | 9272                  |
| pGSK3a/b (S21/S9)                       | 1:1000          | Rabbit polyclonal       | Cell Signaling  | 9331S                 |
| GSK3a/b                                 | 1:1000          | Rabbit monoclonal       | Cell Signaling  | 5676T                 |
| pS6K1                                   | 1:1000          | Rabbit polyclonal       | Sigma-Aldrich   | 07-018                |
| S6K1                                    | 1:1000          | Rabbit polyclonal       | Cell Signaling  | 9202S                 |
| PARP                                    | 1:500           | Rabbit monoclonal       | Cell Signaling  | 9532S                 |
| pSMAD2 (S465/467)/<br>pSMAD3 (S423/425) | 1:1000          | Rabbit monoclonal       | Cell Signaling  | 8828S                 |
| SMAD2/3                                 | 1:1000          | Rabbit monoclonal       | Cell Signaling  | 8685T                 |
| $\beta$ -Actin                          | 1:10000         | Mouse monoclonal        | Sigma- Aldrich  | A5441                 |
| HSP90                                   | 1:5000          | Rabbit polyclonal       | Cell Signaling  | 4874                  |
| goat-anti-mouse IgG HRP                 | 1:10000         | polyclonal              | Dianova         | 115-035-003           |
| donkey-anti-rabbit IgG<br>HRP           | 1:10000         | polyclonal              | Promega         | V795A                 |
| SMAD2/3 controls                        |                 |                         | Cell Signaling  | 12052S                |



**Table S7 Custom detection antibody multiplexes used for BioPlex assay**

| <b>Target</b> | <b>Cat. no.</b> | <b>Standard used</b>                  | <b>Multiplex</b> |
|---------------|-----------------|---------------------------------------|------------------|
| IL-1B         | 171B5001M       | Bio-Plex Pro HuCSP standard           | 1                |
| IL-8          | 171B5008M       | Bio-Plex Pro HuCSP standard           | 1                |
| CXCL1         | 171B6007M       | Bio-Plex Pro HuCSP standard           | 1                |
| CCL11         | 171B5015M       | Bio-Plex Pro HuCSP standard           | 1                |
| CCL2          | 171B5021M       | Bio-Plex Pro HuCSP standard           | 1                |
| IL-9          | 171B5009M       | Bio-Plex Pro HuCSP standard           | 1                |
| CXCL10        | 171B5020M       | Bio-Plex Pro HuCSP standard           | 1                |
| IL-1A         | 171B6001M       | Bio-Plex Pro HuCSP standard           | 1                |
| LIF           | 171B6011M       | Bio-Plex Pro HuCSP standard           | 1                |
| CXCL5         | 171BK14MR2      | Bio-Plex Pro Human Chemokine standard | 2                |
| CXCL6         | 171BK19MR2      | Bio-Plex Pro Human Chemokine standard | 2                |
| CCL7          | 171BK38MR2      | Bio-Plex Pro Human Chemokine standard | 2                |
| TNF-alpha     | 171BK55MR2      | Bio-Plex Pro Human Chemokine standard | 2                |
| CX3CL1        | 171BK18MR2      | Bio-Plex Pro Human Chemokine standard | 2                |
| CXCL2         | 171BK23MR2      | Bio-Plex Pro Human Chemokine standard | 2                |
| CCL17         | 171BK53MR2      | Bio-Plex Pro Human Chemokine standard | 2                |

**Table S8 GO-Term enrichment analysis of upregulated genes**

p-value adjusted using Bonferroni step-down

| <b>GO-Term ID</b> | <b>GO-Term name</b>                                                     | <b>% Associated genes</b> | <b>p-value</b> | <b>adj. p-value</b> |
|-------------------|-------------------------------------------------------------------------|---------------------------|----------------|---------------------|
| GO:0004252        | serine-type endopeptidase activity                                      | 13.91                     | 4.10E-05       | 2.11E-02            |
| GO:0005102        | signaling receptor binding                                              | 11.03                     | 3.27E-09       | 1.73E-06            |
| GO:0005125        | cytokine activity                                                       | 17.12                     | 9.39E-08       | 4.94E-05            |
| GO:0005126        | cytokine receptor binding                                               | 14.83                     | 6.75E-06       | 3.52E-03            |
| GO:0005509        | calcium ion binding                                                     | 11.21                     | 4.55E-05       | 2.34E-02            |
| GO:0005539        | glycosaminoglycan binding                                               | 15.12                     | 1.13E-05       | 5.87E-03            |
| GO:0008009        | chemokine activity                                                      | 28.85                     | 2.80E-06       | 1.46E-03            |
| GO:0008083        | growth factor activity                                                  | 17.34                     | 7.69E-06       | 4.00E-03            |
| GO:0008201        | heparin binding                                                         | 16.67                     | 1.25E-05       | 6.49E-03            |
| GO:0008236        | serine-type peptidase activity                                          | 13.35                     | 8.70E-05       | 4.45E-02            |
| GO:0017171        | serine hydrolase activity                                               | 13.80                     | 2.67E-05       | 1.38E-02            |
| GO:0019838        | growth factor binding                                                   | 17.73                     | 2.92E-05       | 1.51E-02            |
| GO:0030020        | extracellular matrix structural constituent conferring tensile strength | 36.59                     | 8.50E-08       | 4.48E-05            |
| GO:0030545        | signaling receptor regulator activity                                   | 13.18                     | 2.40E-07       | 1.25E-04            |
| GO:0030546        | signaling receptor activator activity                                   | 13.65                     | 1.19E-07       | 6.22E-05            |
| GO:0045236        | CXCR chemokine receptor binding                                         | 55.56                     | 1.05E-07       | 5.54E-05            |
| GO:0048018        | receptor ligand activity                                                | 13.86                     | 6.46E-08       | 3.41E-05            |
| GO:0048407        | platelet-derived growth factor binding                                  | 81.82                     | 2.75E-09       | 1.46E-06            |
| GO:0099094        | ligand-gated cation channel activity                                    | 15.12                     | 8.59E-05       | 4.41E-02            |

**Table S9 GO-Term enrichment analysis of upregulated proteins**

p-value adjusted using Bonferroni step-down

| <b>GO-Term ID</b> | <b>GO-Term name</b>                        | <b>% Associated genes</b> | <b>p-value</b> | <b>adj. p-value</b> |
|-------------------|--------------------------------------------|---------------------------|----------------|---------------------|
| GO:0008093        | cytoskeletal anchor activity               | 12.50                     | 2.57E-04       | 7.70E-04            |
| GO:0017166        | vinculin binding                           | 21.43                     | 4.79E-05       | 2.40E-04            |
| GO:0019838        | growth factor binding                      | 5.67                      | 7.27E-07       | 5.09E-06            |
| GO:0030145        | manganese ion binding                      | 4.05                      | 6.81E-03       | 6.81E-03            |
| GO:0045295        | gamma-catenin binding                      | 16.67                     | 1.06E-04       | 4.23E-04            |
| GO:0048156        | tau protein binding                        | 6.25                      | 2.00E-03       | 4.01E-03            |
| GO:0050431        | transforming growth factor<br>beta binding | 14.81                     | 1.11E-05       | 6.66E-05            |

**Table S10 GO-Term enrichment analysis of downregulated genes**

p-value adjusted using Bonferroni step-down

| <b>GO-Term ID</b> | <b>GO-Term name</b>                                                     | <b>% Associated genes</b> | <b>p-value</b> | <b>adj. p-value</b> |
|-------------------|-------------------------------------------------------------------------|---------------------------|----------------|---------------------|
| GO:0000079        | regulation of cyclin-dependent protein serine/threonine kinase activity | 11.57                     | 1.92E-04       | 4.34E-02            |
| GO:0000166        | nucleotide binding                                                      | 5.75                      | 8.46E-08       | 2.22E-05            |
| GO:0000217        | DNA secondary structure binding                                         | 32.43                     | 6.00E-09       | 1.62E-06            |
| GO:0000400        | four-way junction DNA binding                                           | 35.29                     | 2.47E-05       | 5.78E-03            |
| GO:0003677        | DNA binding                                                             | 5.08                      | 1.23E-04       | 2.84E-02            |
| GO:0003678        | DNA helicase activity                                                   | 24.71                     | 4.42E-12       | 1.23E-09            |
| GO:0003684        | damaged DNA binding                                                     | 14.29                     | 1.43E-04       | 3.28E-02            |
| GO:0003688        | DNA replication origin binding                                          | 38.10                     | 5.25E-07       | 1.34E-04            |
| GO:0003697        | single-stranded DNA binding                                             | 16.91                     | 1.51E-09       | 4.11E-07            |
| GO:0003887        | DNA-directed DNA polymerase activity                                    | 35.00                     | 9.94E-11       | 2.73E-08            |
| GO:0003896        | DNA primase activity                                                    | 85.71                     | 1.93E-08       | 5.16E-06            |
| GO:0004386        | helicase activity                                                       | 12.43                     | 9.54E-07       | 2.37E-04            |
| GO:0004672        | protein kinase activity                                                 | 7.15                      | 3.77E-09       | 1.02E-06            |
| GO:0004674        | protein serine/threonine kinase activity                                | 7.24                      | 1.07E-06       | 2.64E-04            |
| GO:0004693        | cyclin-dependent protein serine/threonine kinase activity               | 10.67                     | 1.80E-04       | 4.09E-02            |
| GO:0005524        | ATP binding                                                             | 6.35                      | 1.80E-07       | 4.65E-05            |
| GO:0008017        | microtubule binding                                                     | 13.85                     | 5.89E-13       | 1.64E-10            |
| GO:0008092        | cytoskeletal protein binding                                            | 7.02                      | 1.82E-07       | 4.70E-05            |
| GO:0008094        | ATP-dependent activity, acting on DNA                                   | 16.90                     | 6.74E-10       | 1.84E-07            |

|            |                                                                                    |       |          |          |
|------------|------------------------------------------------------------------------------------|-------|----------|----------|
| GO:0010997 | anaphase-promoting complex binding                                                 | 66.67 | 2.17E-07 | 5.58E-05 |
| GO:0015631 | tubulin binding                                                                    | 10.76 | 4.40E-10 | 1.21E-07 |
| GO:0016301 | kinase activity                                                                    | 6.57  | 3.37E-08 | 8.97E-06 |
| GO:0016462 | pyrophosphatase activity                                                           | 6.03  | 1.29E-05 | 3.11E-03 |
| GO:0016772 | transferase activity, transferring phosphorus-containing groups                    | 6.90  | 6.27E-11 | 1.73E-08 |
| GO:0016773 | phosphotransferase activity, alcohol group as acceptor                             | 6.58  | 1.26E-07 | 3.27E-05 |
| GO:0016779 | nucleotidyltransferase activity                                                    | 10.40 | 2.77E-05 | 6.42E-03 |
| GO:0016817 | hydrolase activity, acting on acid anhydrides                                      | 6.01  | 1.40E-05 | 3.34E-03 |
| GO:0016818 | hydrolase activity, acting on acid anhydrides, in phosphorus-containing anhydrides | 6.01  | 1.40E-05 | 3.34E-03 |
| GO:0016887 | ATP hydrolysis activity                                                            | 9.49  | 5.98E-07 | 1.51E-04 |
| GO:0016888 | endodeoxyribonuclease activity, producing 5'-phosphomonoesters                     | 33.33 | 1.66E-04 | 3.79E-02 |
| GO:0017076 | purine nucleotide binding                                                          | 5.72  | 7.32E-07 | 1.84E-04 |
| GO:0017108 | 5'-flap endonuclease activity                                                      | 62.50 | 3.87E-06 | 9.48E-04 |
| GO:0017111 | nucleoside-triphosphatase activity                                                 | 6.06  | 1.55E-05 | 3.67E-03 |
| GO:0017116 | single-stranded DNA helicase activity                                              | 56.00 | 3.23E-14 | 9.08E-12 |
| GO:0030554 | adenyl nucleotide binding                                                          | 6.35  | 8.40E-08 | 2.21E-05 |
| GO:0032147 | activation of protein kinase activity                                              | 10.18 | 1.65E-05 | 3.89E-03 |
| GO:0032553 | ribonucleotide binding                                                             | 5.70  | 8.65E-07 | 2.16E-04 |
| GO:0032555 | purine ribonucleotide binding                                                      | 5.71  | 8.89E-07 | 2.21E-04 |
| GO:0032559 | adenyl ribonucleotide binding                                                      | 6.40  | 5.81E-08 | 1.54E-05 |
| GO:0034061 | DNA polymerase activity                                                            | 15.74 | 5.97E-07 | 1.51E-04 |

|            |                                                             |        |          |          |
|------------|-------------------------------------------------------------|--------|----------|----------|
| GO:0035173 | histone kinase activity                                     | 33.33  | 3.58E-05 | 8.28E-03 |
| GO:0035639 | purine ribonucleoside triphosphate binding                  | 5.56   | 7.60E-06 | 1.85E-03 |
| GO:0043085 | positive regulation of catalytic activity                   | 6.12   | 1.36E-05 | 3.25E-03 |
| GO:0043138 | 3'-5' DNA helicase activity                                 | 37.50  | 1.65E-05 | 3.88E-03 |
| GO:0043168 | anion binding                                               | 5.31   | 6.66E-06 | 1.63E-03 |
| GO:0043549 | regulation of kinase activity                               | 7.37   | 3.74E-07 | 9.57E-05 |
| GO:0045859 | regulation of protein kinase activity                       | 7.64   | 5.83E-07 | 1.48E-04 |
| GO:0048256 | flap endonuclease activity                                  | 55.56  | 8.44E-06 | 2.04E-03 |
| GO:0051338 | regulation of transferase activity                          | 8.48   | 3.27E-12 | 9.09E-10 |
| GO:0051347 | positive regulation of transferase activity                 | 8.59   | 1.18E-08 | 3.17E-06 |
| GO:0071900 | regulation of protein serine/threonine kinase activity      | 8.11   | 2.56E-05 | 5.96E-03 |
| GO:0140097 | catalytic activity, acting on DNA                           | 13.13  | 5.42E-13 | 1.52E-10 |
| GO:1900262 | regulation of DNA-directed DNA polymerase activity          | 57.14  | 9.81E-09 | 2.64E-06 |
| GO:1900264 | positive regulation of DNA-directed DNA polymerase activity | 57.14  | 9.81E-09 | 2.64E-06 |
| GO:1901265 | nucleoside phosphate binding                                | 5.75   | 8.67E-08 | 2.26E-05 |
| GO:1903932 | regulation of DNA primase activity                          | 100.00 | 7.60E-08 | 2.01E-05 |
| GO:1903934 | positive regulation of DNA primase activity                 | 100.00 | 7.60E-08 | 2.01E-05 |
| GO:1904666 | regulation of ubiquitin protein ligase activity             | 26.67  | 1.12E-05 | 2.69E-03 |

|            |                                                             |       |          |          |
|------------|-------------------------------------------------------------|-------|----------|----------|
| GO:1904668 | positive regulation of ubiquitin<br>protein ligase activity | 50.00 | 2.17E-06 | 5.33E-04 |
|------------|-------------------------------------------------------------|-------|----------|----------|

**Table S11 GO-Term enrichment analysis of downregulated proteins**

p-value adjusted using Bonferroni step-down

| <b>GO-Term ID</b> | <b>GO-Term name</b>                                                                                         | <b>% Associated genes</b> | <b>p-value</b> | <b>adj. p-value</b> |
|-------------------|-------------------------------------------------------------------------------------------------------------|---------------------------|----------------|---------------------|
| GO:0003678        | DNA helicase activity                                                                                       | 8.24                      | 5.25E-06       | 3.67E-05            |
| GO:0003688        | DNA replication origin binding                                                                              | 14.29                     | 5.96E-04       | 1.19E-03            |
| GO:0003697        | single-stranded DNA binding                                                                                 | 5.15                      | 1.11E-04       | 4.43E-04            |
| GO:0004386        | helicase activity                                                                                           | 5.08                      | 1.26E-05       | 6.30E-05            |
| GO:0008094        | ATP-dependent activity, acting on DNA                                                                       | 6.34                      | 2.09E-06       | 1.67E-05            |
| GO:0016796        | exonuclease activity, active with either ribo- or deoxyribonucleic acids and producing 5'-phosphomonoesters | 4.62                      | 1.52E-02       | 1.52E-02            |
| GO:0016887        | ATP hydrolysis activity                                                                                     | 4.34                      | 4.38E-08       | 4.38E-07            |
| GO:0017116        | single-stranded DNA helicase activity                                                                       | 24.00                     | 3.65E-08       | 4.01E-07            |
| GO:0035173        | histone kinase activity                                                                                     | 16.67                     | 3.72E-04       | 1.12E-03            |
| GO:0043138        | 3'-5' DNA helicase activity                                                                                 | 25.00                     | 6.58E-06       | 3.95E-05            |
| GO:0140097        | catalytic activity, acting on DNA                                                                           | 4.18                      | 4.99E-07       | 4.50E-06            |



**Table S12 AUC-log2FCs of cytokine secretion during dabrafenib withdrawal**

$\log_2FC = \log_2(AUC_{\text{dabrafenib wd} +1}) - \log_2(AUC_{\text{DMSO wd} +1})$ . AUC = area under the curve,  
wd = withdrawal

| <b>cytokine</b> | <b>AUC log2FC</b> |
|-----------------|-------------------|
| CCL11           | 5.52              |
| CX3CL1          | 3.80              |
| CCL2            | 3.68              |
| CCL7            | 2.38              |
| IL1b            | 2.15              |
| CCL17           | 1.81              |
| LIF             | 1.51              |
| CXCL10          | 1.14              |
| CXCL2           | 1.10              |
| TNF             | 1.08              |
| CXCL5           | 1.00              |
| CXCL6           | 0.83              |
| IL8             | 0.59              |
| CXCL1           | 0.47              |
| IL9             | -1.08             |
| IL1a            | -2.59             |
